# Supplementary material for: Combined artificial high-silicate medium and LED illumination promote carotenoid accumulation in the marine diatom Phaeodactylum tricornutum
Source: Microb Cell Fact. 2019 Dec 2;18:209. doi: 10.1186/s12934-019-1263-1 (PMC6889666; doi:10.1186/s12934-019-1263-1)
Supplement: Supplementary file 1 — Additional file 1. Additional figures and table. [file 12934_2019_1263_MOESM1_ESM.docx]

*Microbial Cell Factories*

Combined artificial high-silicate medium and LED illumination promote carotenoid accumulation in the marine diatom *Phaeodactylum tricornutum*

Zhiqian Yi1,2,5, Yixi Su1, Paulina Cherek5, David R. Nelson3, Jianping Lin4, Ottar Rolfsson1, Hua Wu2, Kourosh Salehi-Ashtiani3, Sigurdur Brynjolfsson1, Weiqi Fu1,3,*

1 Center for Systems Biology and Faculty of Industrial Engineering, Mechanical Engineering and Computer Science, School of Engineering and Natural Sciences, University of Iceland, Reykjavík 101, Iceland;

2 Department of Orthopaedics, Tongji Hospital, Tongji Medical College, Huazhong University of Science and Technology, Wuhan, China 430030;

3Center for Genomics and Systems Biology, and Division of Science and Math, New York University Abu Dhabi, Abu Dhabi 129188,

4Key Laboratory of Biomass Chemical Engineering of the Ministry of Education, College of Chemical and biological Engineering, Zhejiang University, Hangzhou, 310027, China;

5Biomedical Center and Department of Anatomy, Faulty of Medicine, University of Iceland, Reykjavík 101, Iceland;

*****Author to whom correspondence should be addressed: WF, [weiqi@hi.is](mailto:weiqi@hi.is); Tel: +971-563052428

**Figure S1**

**Fig. S1** Growth of*P. tricornutum* on silicate free PT-6 medium under red LED and combined red and blue (50:50) LED illumination. The light intensities were 128 μE/m2/s for red light and 102 μE/m2/s for combined red and blue lights, respectively. The results presented are average values from three independent experiments. Error bars indicate SD.

**Figure S2**

**Fig. S2** Effect of different incident photon fluxes on the chlorophyll *a* and beta-carotene content in *P. tricornutum* under combined red and blue (50:50) LED illumination. The results presented are average values from three independent experiments. Error bars indicate SD.

**Table S1** Nutrient composition of media PT-8 and PT-7

| Compound | PT-8 (mg/L) | PT-7 (mg/L) |
| --- | --- | --- |
| NaCl | 29250 | 29250 |
| MgSO4 ·7H2O | 1232 | 1232 |
| H3BO3 | 124 | 124 |
| KNO3 | 3150 | 3150 |
| Na2SiO3 | 366 | 36.6 |
| Na2HPO4 | -- | 568 |
| NaH2PO4 ·H2O | 552 | -- |
| NaFeEDTA | 10.0 | 10.0 |
| Cyanocobalamin (Vitamin B12) | 0.0135 | 0.0135 |
| Thiamine HCl (Vitamin B1) | 0.5 | 0.5 |
| Biotin | 0.001 | 0.001 |
| CuSO4 · 5H2O | 0.75 | 0.75 |
| ZnSO4 · 7H2O | 4.6 | 4.6 |
| CoCl2 · 6H2O | 0.24 | 0.24 |
| MnCl2 · 4H2O | 0.69 | 0.69 |
| Na2MoO4 · 2H2O | 0.36 | 0.36 |
| CaCl2 ·2H2O | 13.0 | 13.0 |
